# Supplementary material for: Cannabis-Based Medicine for Neuropathic Pain and Spasticity—A Multicenter, Randomized, Double-Blinded, Placebo-Controlled Trial
Source: MDPI journal article supplement (doi:10.3390/ph16081079), 2023-07-28
Supplement: s1 [file s1]

## Supplementary Materials

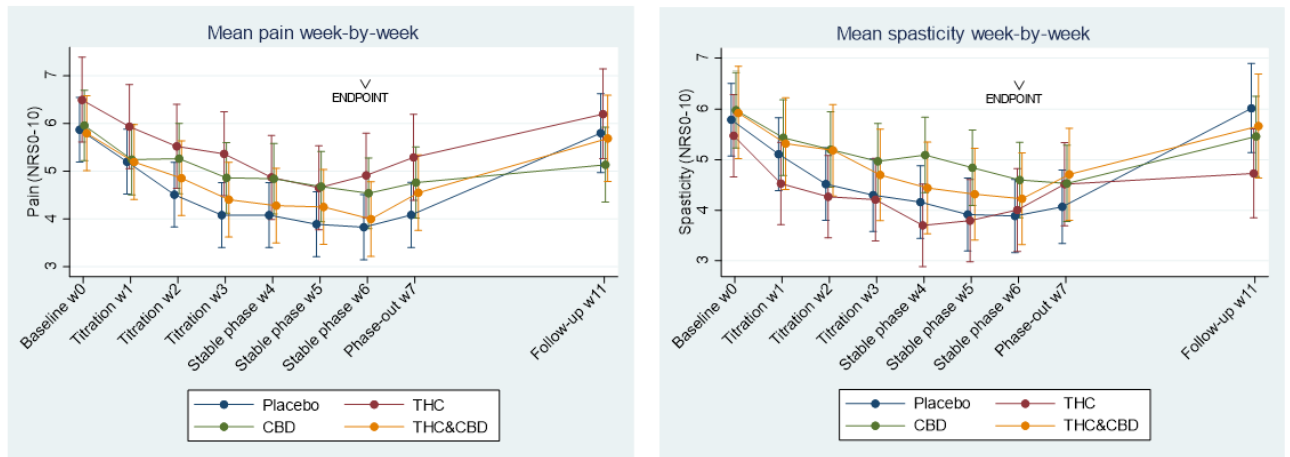

**Figure S1.** Neuropathic pain (left) and spasticity (right) presented as means week-by-week in the per-protocol population, MIXED method analysis.

Legend Figure S1: Weekly intensity of neuropathic pain and spasticity, stable week 6 is the endpoint measurement, week 7 is phaseout, and follow-up registration was performed 4 weeks after treatment. THC: delta-9-tetrahydrocannabinol, CBD: cannabidiol, THC&CBD: delta-9-tetrahydrocannabinol and cannabidiol, NRS: numerical rating scale 0–10.

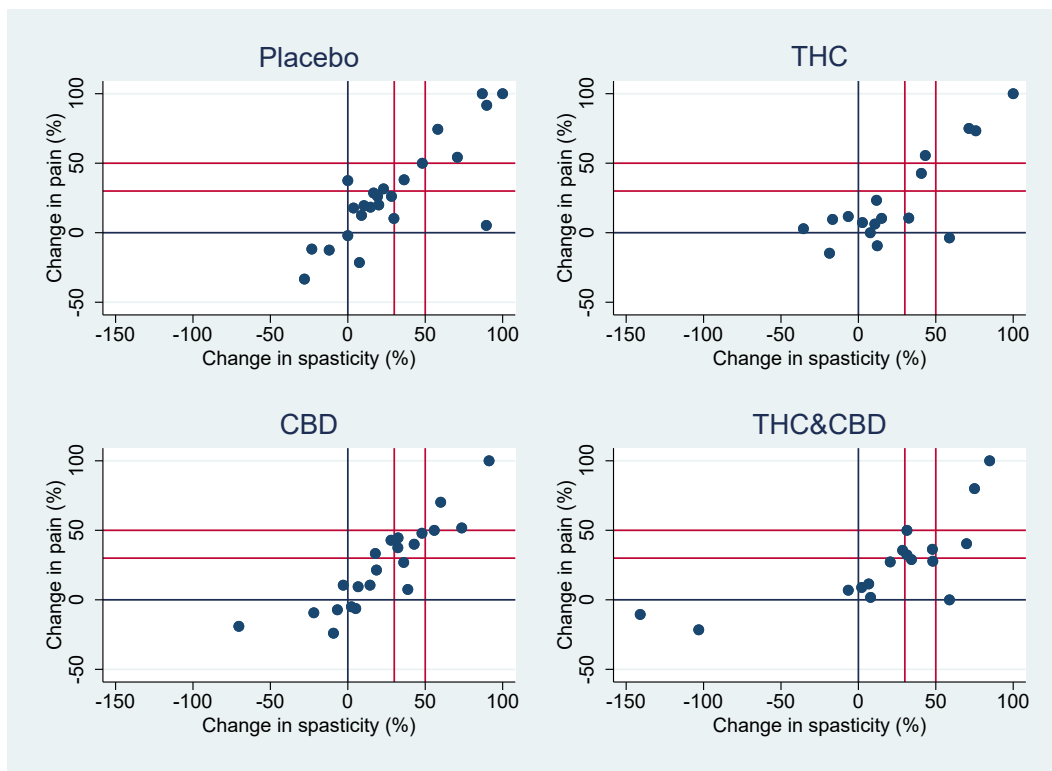

**Figure S2.** Scatterplot illustrates the relative change in percentages for pain and spasticity for patients fulfilling both the inclusion criteria for pain AND spasticity.

Legend Figure S2. THC: delta-9-tetrahydrocannabinol, CBD: cannabidiol, THC&CBD: delta-9-tetrahydrocannabinol and cannabidiol. A Spearman's rho ( $\rho$ ) and  $p$ -values showed a strong positive correlation for the difference in pain and spasticity for all patient groups that had both pain and spasticity (placebo  $\rho$  0.75,

$p < 0.001$ , THC  $q = 0.64$ ,  $p = 0.005$ , CBD  $q = 0.91$ ,  $p < 0.001$ , THC&CBD  $q = 0.75$ ,  $p < 0.001$ ). Vertical red lines are 30% and 50% change in spasticity. Horizontal red lines are 30% and 50% change in pain, respectively. The blue lines (horizontal and verticals are the “0”-lines.) Each dot reflects one subject’s change in pain and spasticity, respectively.

**Table S1.** Adverse events “other”.

| Treatment                                                                                                                    | Adverse Event(s)                                                                                   |
|------------------------------------------------------------------------------------------------------------------------------|----------------------------------------------------------------------------------------------------|
| Placebo ( $n = 3$ )                                                                                                          | Sleep disturbance, joint pain                                                                      |
|                                                                                                                              | Prolonged bladder emptying, urge to urinate at night, stress incontinence, restless night’s sleep  |
|                                                                                                                              | Pain on the outside of the thighs and hips. General fatigue in lower legs and arms (evening/night) |
| THC ( $n = 7$ )                                                                                                              | Increased appetite, abdominal pain, and nausea                                                     |
|                                                                                                                              | Exacerbation of spasms and affected (poorer) standing function                                     |
|                                                                                                                              | Affected “internal thermostat”                                                                     |
|                                                                                                                              | Stinging sensation in the hands and decreased desire for exercise                                  |
|                                                                                                                              | Affected short-term memory                                                                         |
| CBD ( $n = 3$ )                                                                                                              | Negative emotions are more overwhelming, thoughts “flying”                                         |
|                                                                                                                              | Instability and gait disturbance, stiffness, uncontrolled motions, incontinence                    |
|                                                                                                                              | Itching                                                                                            |
| THC&CBD ( $n = 14$ )                                                                                                         | Pain—Gallstone attack                                                                              |
|                                                                                                                              | Flatulence                                                                                         |
|                                                                                                                              | Obstipation                                                                                        |
| THC&CBD ( $n = 14$ )                                                                                                         | Confusion/affected ability to concentrate                                                          |
|                                                                                                                              | Affected “overview” (short term)                                                                   |
|                                                                                                                              | Affected (poorer) gait function and quality of life                                                |
|                                                                                                                              | Affected (poorer) gait function and decreased appetite                                             |
|                                                                                                                              | Eye pain, cramps in the calves and feet, affected (poorer) short-term memory, feeling “strange”    |
|                                                                                                                              | “Cheese bell” sensation                                                                            |
|                                                                                                                              | Increased appetite and weight gain                                                                 |
|                                                                                                                              | Bad mood                                                                                           |
|                                                                                                                              | Feeling stoned, with red eyes                                                                      |
|                                                                                                                              | Affected (poorer) gait function                                                                    |
|                                                                                                                              | Feeling irritated, especially before the next dose                                                 |
|                                                                                                                              | Burning sensation in extremities (like an attack), feeling drunk, sweating                         |
| Legend Table S1. THC: delta-9-tetrahydrocannabinol, CBD: cannabidiol, THC&CBD: delta-9-tetrahydrocannabinol and cannabidiol. |                                                                                                    |

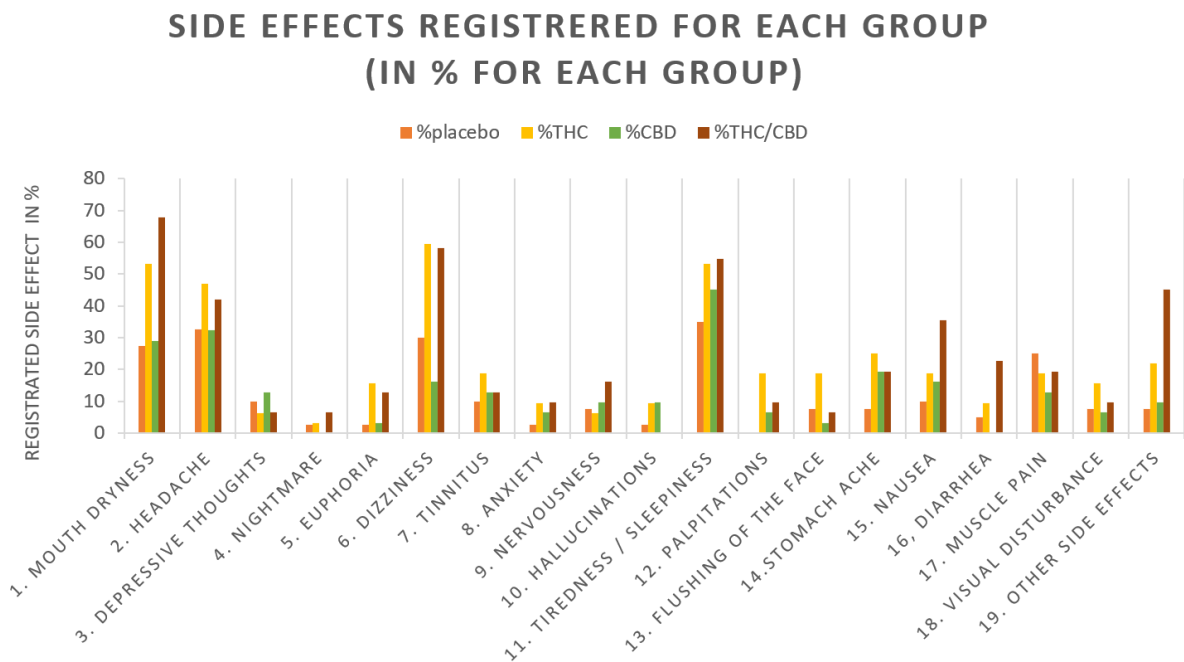

**Figure S3.** Showing adverse events in percentage for each group.

Legend Figure S3. Adverse events in percentage for each of the groups. A complete list of “other adverse events” is reported in table S1.

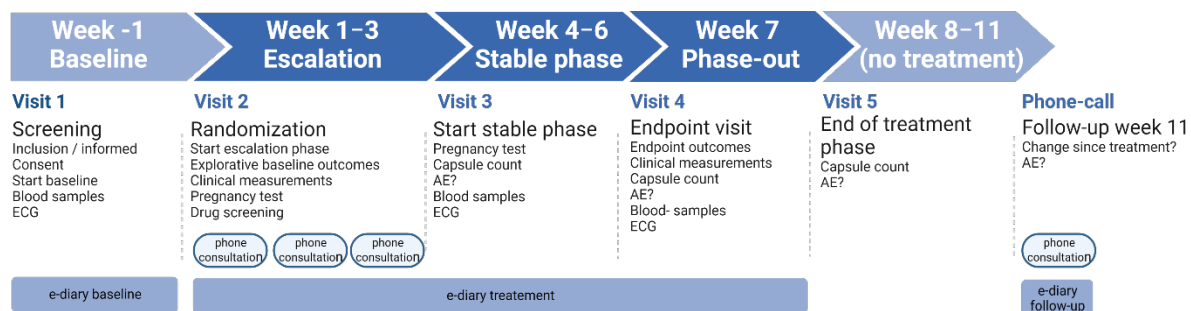

**Figure S4.** Study visits and contents of different phases during the study.

Legend Figure S4. Study design and content. AE: adverse event, ECG: electrocardiogram, e-diary: electronic diary. Figure created in Biorender.com.
